# Supplementary material for: Fabrication of highly efficient encapsulated SnO2@alginate beads as regenerative nanosorbents for anionic dye pollutants removal from aqueous solution
Source: Royal Society of Chemistry journal article supplement (doi:10.1039/d3ma00615h), 2023-01-01
Supplement: d3ma00615h3.pdf [file d3ma00615h3.pdf]

## Supplementary Information

### **Fabrication of Highly Efficient Encapsulated SnO<sub>2</sub>@Alginate Beads as Regenerative Nanosorbents for Anionic Dye Pollutants Removal from Aqueous Solution**

Shikha Jyoti Borah<sup>1</sup>, Akanksha Gupta<sup>2</sup>, Kashyap Kumar Dubey<sup>3</sup>, Vinod Kumar\*<sup>1</sup>

<sup>1</sup>Special Centre for Nano Science, Jawaharlal Nehru University, Delhi-110067, India;

<sup>2</sup>Department of Science and Technology, Delhi-110016, India; <sup>3</sup>School of Biotechnology, Jawaharlal Nehru University, Delhi-110067, India.

**S1: Adsorption Efficiency**

**S2: Adsorption Kinetics**

**S3: Adsorption Isotherms**

**S4: Calculation for Sn concentration in treated water**

**Table S1:** Adsorption isotherm parameters obtained using Langmuir, Freundlich and Temkin model

**Figure S1:** Moving anti-clockwise, 1,2,3 and 4 depicts synthesized SnO<sub>2</sub> NPs, SnO<sub>2</sub> NPs after adsorption of CR dye, completely dried SnO<sub>2</sub>@SA beads and completely dried SnO<sub>2</sub>@SA beads after adsorption, respectively.

**Figure S2:** From L to R, pure SA beads, 0.2% SnO<sub>2</sub>@SA beads and 0.2% SnO<sub>2</sub>@SA beads after adsorption of CR dye.

**Figure S3:** XRD obtained for SnO<sub>2</sub>@SA beads (a) before and (b) after adsorption of 5 μM CR from its aqueous solution.

**Figure S4:** SEM images of (a) various sizes of spherically shaped SnO<sub>2</sub> NPs; (b), (c) and (d) 0.2% SnO<sub>2</sub>@SA beads at various magnifications.

**Figure S5:** (a) UV-Vis plot for different concentrations of CR dye (5- 60 μM); (b) Linear fit analysis and (c) Image of the various CR concentrations used in this study.

**Figure S6:** Adsorption of 5 μM CR dye using (a) 0.1 g SnO<sub>2</sub> NPs and (b) 0.5% SnO<sub>2</sub>@SA beads

**Figure S7:** 0.1% SnO<sub>2</sub>@SA beads before and after 10 min adsorption

**Figure S8:** 0.2% SnO<sub>2</sub>@SA beads before and after 10 min adsorption

**Figure S9:** Adsorption of 5 μM CR using 0.5% SnO<sub>2</sub>@SA beads within 5 min

**Figure S10:** MeOH used as an elluent for regenerative studies pale red color observed after being in contact with 0.2% SnO<sub>2</sub>@SA beads for 2 min with continuous stirring

**Video S1:** Video demonstrating the adsorption of CR by SnO<sub>2</sub> NPs. Within 1 min of contact time rapid adsorption results in change in color from light red to nearly grayish white color.

**Video S2:** Video demonstrating the adsorption of CR by 0.5% SnO<sub>2</sub>@SA beads. Within the first min of contact, rapid adsorption results in change in color from light red to nearly transparent solution.

### S1: Adsorption Efficiency

The removal efficiency ( $\eta$ ) has been calculated using Equation (S1), where  $C_0$  and  $C_t$  are concentrations at  $t=0$  and at time  $t$ , respectively<sup>1,2</sup>.

$$\eta = \frac{C_0 - C_t}{C_0} \times 100 \quad \text{Equation S1}$$

### S2: Adsorption Kinetics

The PFO<sup>3</sup> kinetic model is expressed as:

$$\ln(q_e - q_t) = \ln(q_e) - k_1 t, \quad \text{Equation S2}$$

where  $k_1$  ( $\text{min}^{-1}$ ) refers to the equilibrium rate constant;  $q_e$  ( $\text{mg/g}$ ) and  $q_t$  ( $\text{mg/g}$ ) indicate the amount of dye adsorbed at equilibrium and time  $t$ , respectively. The slope and intercept obtained from the plot of  $\ln(q_e - q_t)$  versus  $t$  were used to determine the values of  $k_1$  and  $q_e$ , respectively.

Contrastingly, the pseudo-second-order (PSO)<sup>4</sup> kinetic model follows the equation:

$$\frac{t}{q_t} = \frac{1}{k_2 q_e^2} + \left(\frac{1}{q_e}\right)t, \quad \text{Equation S3}$$

where  $k_2$  ( $\text{g mg}^{-1} \text{min}^{-1}$ ) refers to the PSO rate constant. The plot of  $\frac{t}{q_t}$  versus  $t$  is used to determine the values of  $k_2$  and  $q_e$ .

Additional investigations to determine the probabilities of IPD resistance affecting the adsorption of CR on  $\text{SnO}_2$  were carried out by using IPD<sup>5,6</sup> model, which follows:

$$q_t = k_p t^{1/2} + C, \quad \text{Equation S4}$$

where  $k_p$  ( $\text{mg g}^{-1} \text{min}^{-1/2}$ ) is the IPD rate constant and  $C$  ( $\text{mg/g}$ ) is the intercept. The slope from the linear plot of  $q_t$  versus  $t^{1/2}$ , is used to determine the values of  $k_p$  and  $q_e$ .

### S3. Adsorption Isotherms

The Langmuir isotherm predicts that monolayer adsorption originates at binding sites with homogeneous energy levels, independent of interactions between adsorbed molecules and the transfer of adsorbed molecule onto the adsorption surface<sup>7</sup>. The Langmuir equation can be expressed as:

$$\frac{C_e}{q_e} = \frac{1}{k_1 q_m} + \frac{1}{q_m} C_e, \quad \text{Equation S5}$$

where  $q_e$ ,  $C_e$ ,  $k_1$ ,  $q_m$  are adsorption capacity at equilibrium ( $\text{mg/g}$ ), equilibrium concentration ( $\text{mg/L}$ ), constant related to free energy of adsorption ( $\text{L/mg}$ ) and maximum adsorption capacity at monolayer coverage ( $\text{mg/g}$ ), respectively.

The favorability of the adsorption isotherm was further determined by evaluating the dimensionless separation factor ( $R_L$ ), using the equation<sup>7,8</sup>

$$R_L = \frac{1}{1 + k_1 C_0}, \quad \text{Equation S6}$$

The Freundlich isotherm holds true for non-ideal sorption on heterogeneous surfaces as well as multilayer sorption<sup>9</sup>. It is represented as:

$$\ln q_e = \ln k_f - \frac{1}{n} \ln C_e, \quad \text{Equation S7}$$

where  $k_f$  and  $n$  are the Freundlich constants of the system. The reaction is favorable when  $0 < 1/n < 1$ , but reaction is unfavorable if  $n > 1$ .

Temkin isotherm is generally used for heterogeneous systems or non-uniform distribution of sorption heat<sup>10</sup>. It is represented as

$$q_e = \frac{RT}{b} \ln K_t + \frac{RT}{b} \ln C_e, \quad \text{Equation S7}$$

where  $K_t$  is the equilibrium binding constant,  $b$  is related to the adsorption heat,  $R$  is universal gas constant and  $T$  is temperature.

#### **S4: Calculation for Sn concentration in treated water**

Molecular weight of  $\text{SnO}_2 = 151$  g and atomic weight of  $\text{Sn} = 118$  g

151 g of  $\text{SnO}_2$  has 118 g of Sn, then 0.5 g of  $\text{SnO}_2$  contains,  $\frac{0.5 \times 118}{151} = 0.3940 \text{ g} = 394 \text{ mg}$

394 mg of Sn is used to prepare  $\text{SnO}_2@SA$  beads, which are added to 100 mL of CR dye aqueous solution. So, 394mg/100 mL or 3940 mg/L of Sn (encapsulated within beads) is used to treat CR dye aqueous solution.

Detected Sn levels in treated water = 7.729 ppb or 0.007729 mg/L.

Thus, percentage of Sn present in CR after treatment =  $\frac{0.007729}{3940} \times 100 = 0.0002 \%$

**Table S1** Adsorption isotherm parameters obtained using Langmuir, Freundlich and Temkin model

**Langmuir Model**

|                             |          |
|-----------------------------|----------|
| <b>q<sub>m</sub> (mg/g)</b> | 961.54   |
| <b>R<sup>2</sup></b>        | 0.9998   |
| <b>k<sub>L</sub></b>        | 8.8135   |
| <b>R<sub>L</sub></b>        | 0.000113 |

**Freundlich Model**

|                      |        |
|----------------------|--------|
| <b>R<sup>2</sup></b> | 0.9177 |
| <b>1/n</b>           | 0.0083 |
| <b>k<sub>f</sub></b> | 20.025 |

**Temkin Model**

|                      |        |
|----------------------|--------|
| <b>R<sup>2</sup></b> | 0.9178 |
|----------------------|--------|

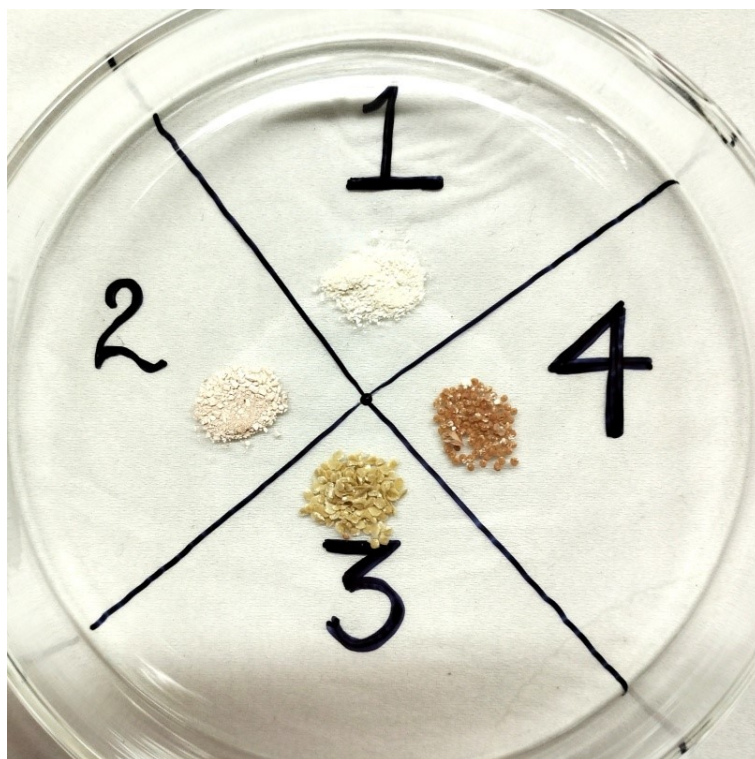

**Fig. S1.** Moving anti-clockwise, 1,2,3 and 4 depicts synthesized  $\text{SnO}_2$  NPs, 0.1 g  $\text{SnO}_2$  NPs after adsorption of CR dye, completely dried 0.5%  $\text{SnO}_2@SA$  beads and completely dried 0.5 %  $\text{SnO}_2@SA$  beads after adsorption, respectively.

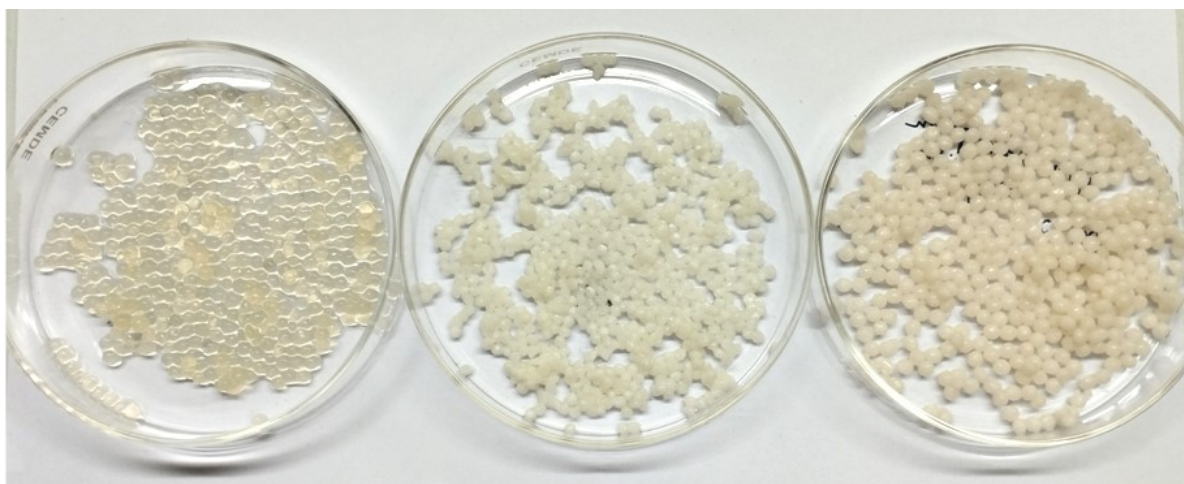

**Fig. S2.** From L to R, pure SA beads, 0.2%  $\text{SnO}_2@SA$  beads and 0.2%  $\text{SnO}_2@SA$  beads after adsorption of CR dye

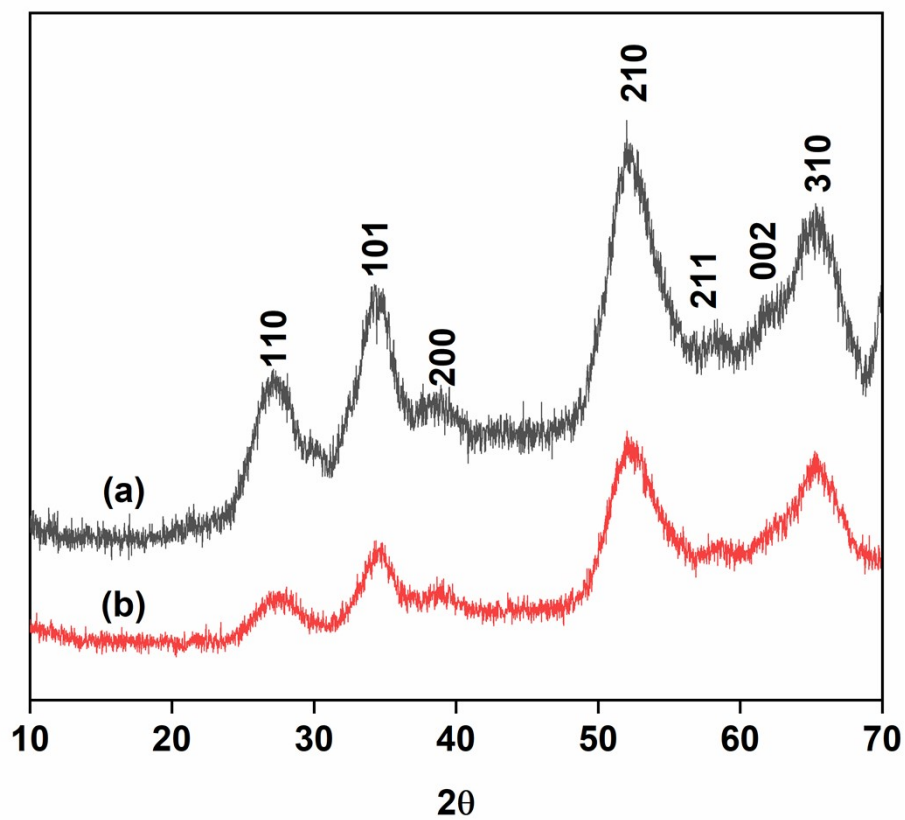

**Fig. S3.** XRD obtained for SnO<sub>2</sub>@SA beads (a) before and (b) after adsorption of 5  $\mu$ M CR from its aqueous solution.



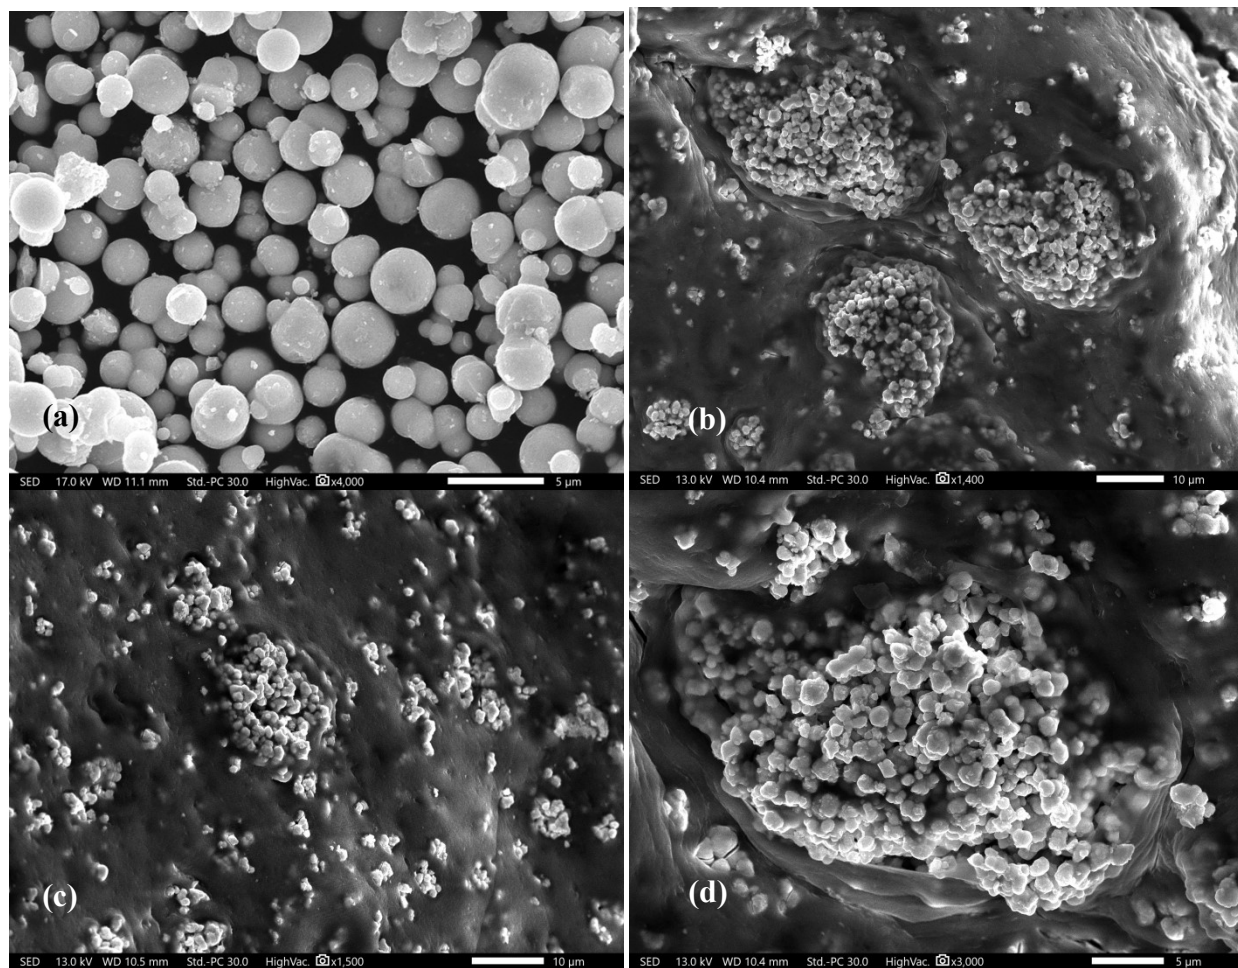

**Fig. S4.** SEM images of (a) various sizes of spherically shaped SnO<sub>2</sub> NPs; (b), (c) and (d) 0.2% SnO<sub>2</sub>@SA beads at various magnifications

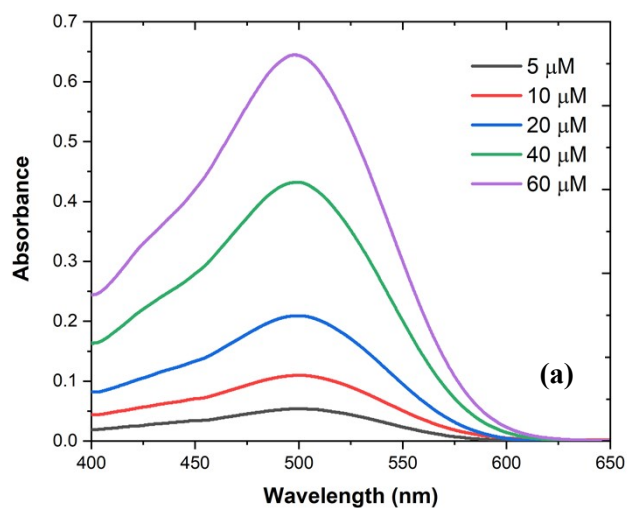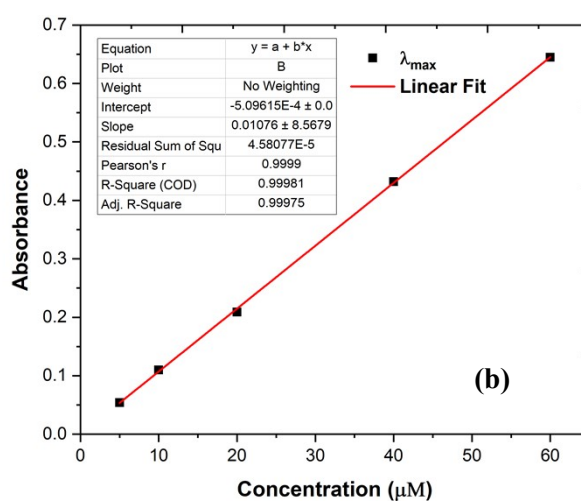

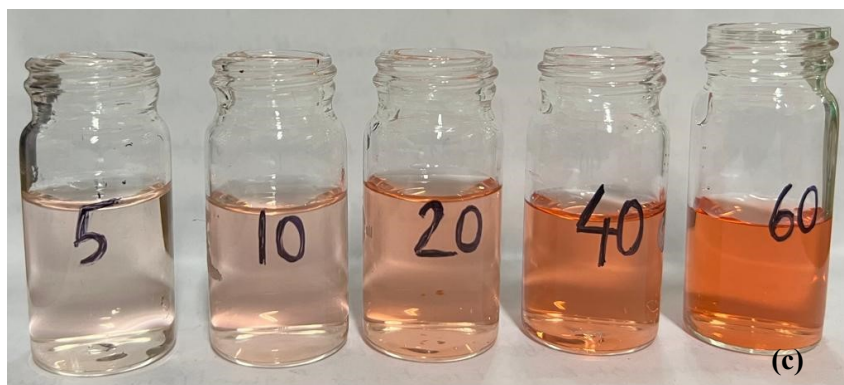

**Fig. S5.** (a) UV-Vis plot for different concentrations of CR dye (5- 60  $\mu\text{M}$ ); (b) Linear fit analysis and (c) Image of the various CR concentrations used in this study

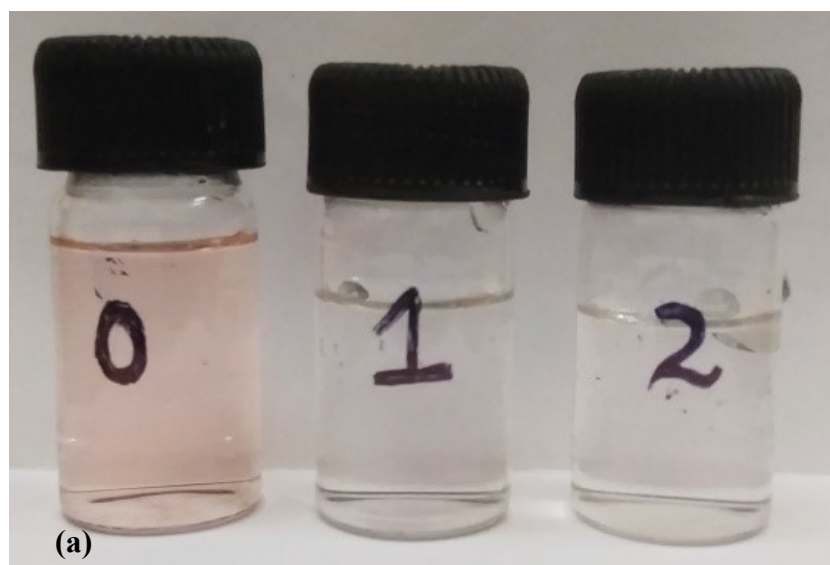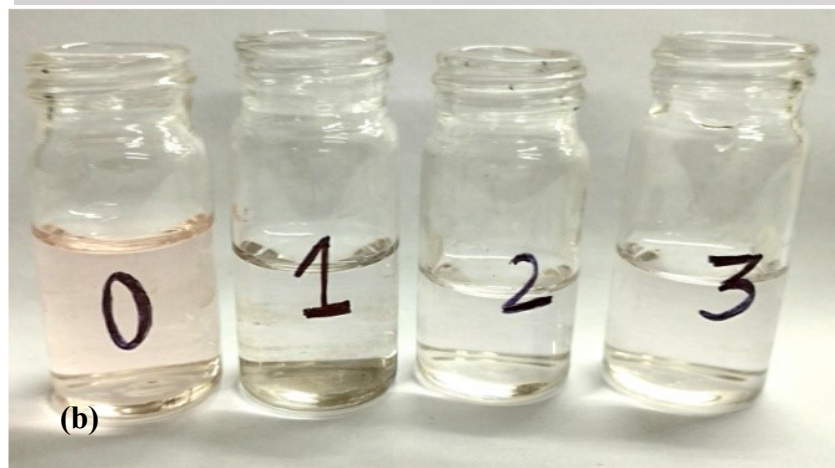

**Fig. S6.** Adsorption of 5  $\mu\text{M}$  CR dye using (a) powdered 0.1 g  $\text{SnO}_2$  NPs and (b) 0.5%  $\text{SnO}_2@SA$  beads

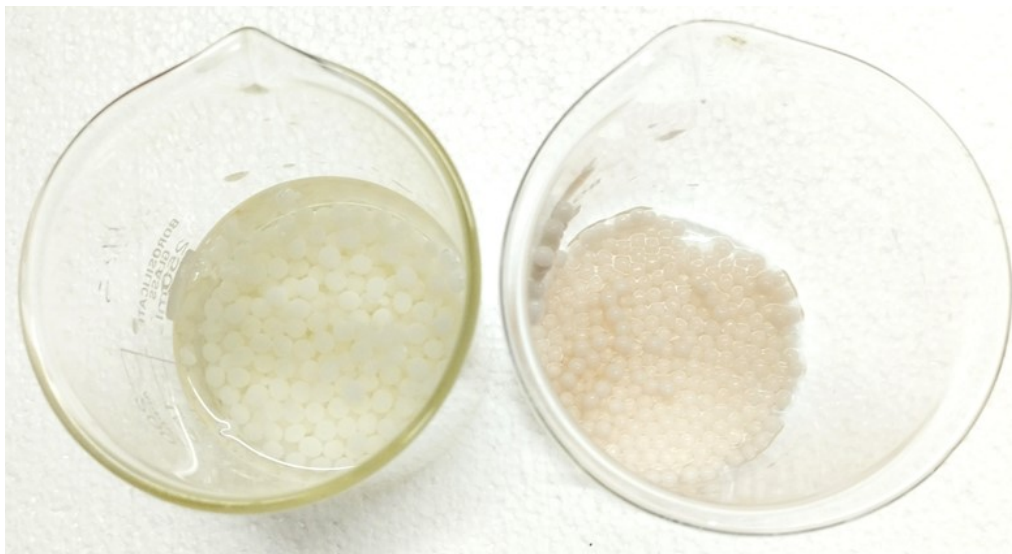

**Fig. S7.** 0.1%  $\text{SnO}_2@SA$  beads before and after 10 min adsorption

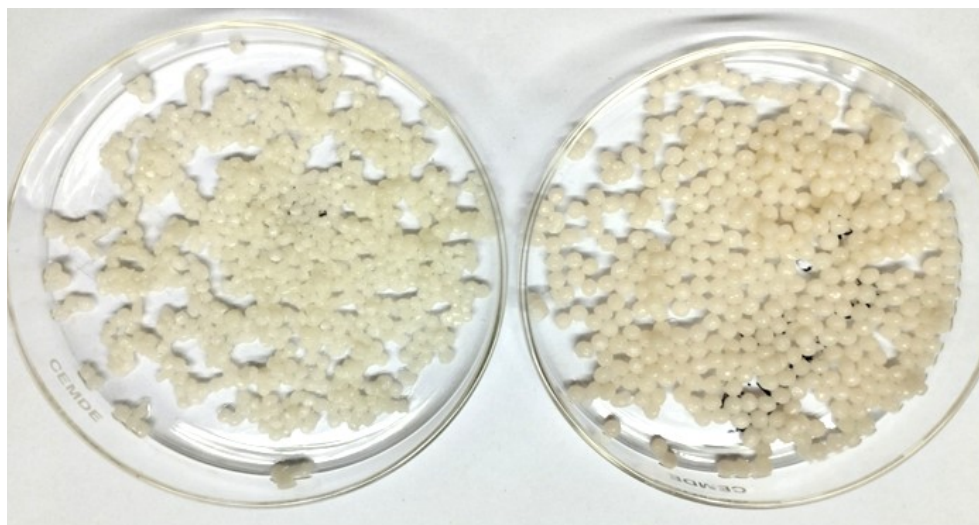

**Fig. S8.** 0.2%  $\text{SnO}_2@SA$  beads before and after 10 min adsorption



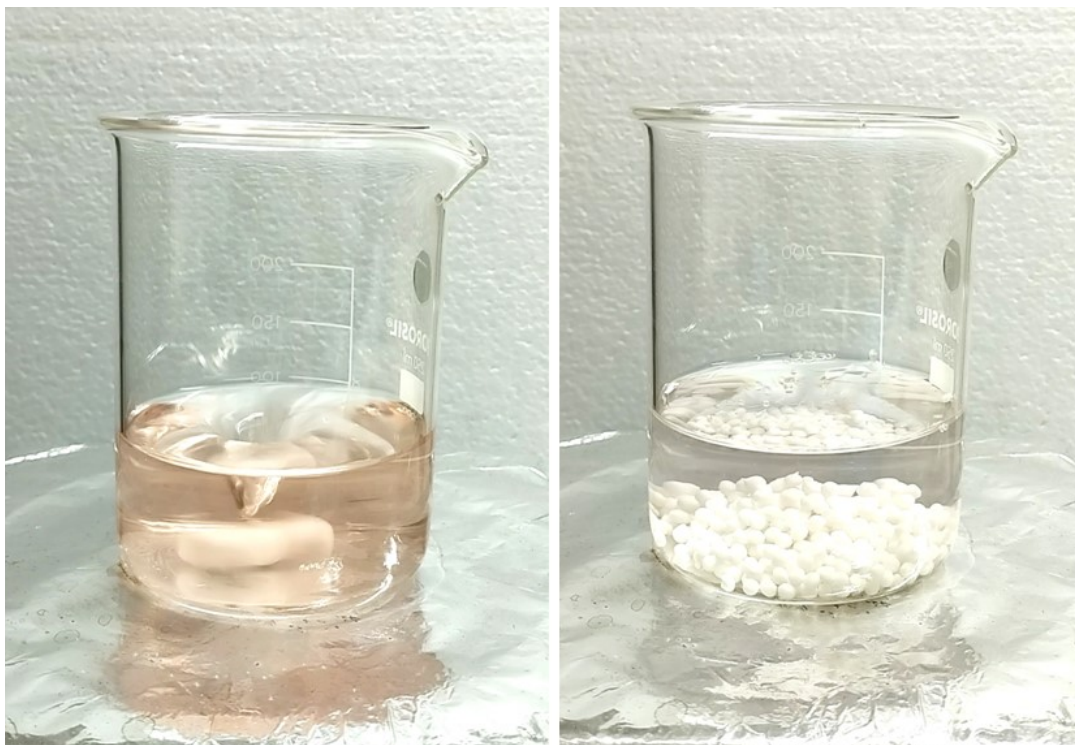

**Fig. S9.** Adsorption of 5  $\mu\text{M}$  CR using 0.5%  $\text{SnO}_2/\text{SA}$  beads within 2 min

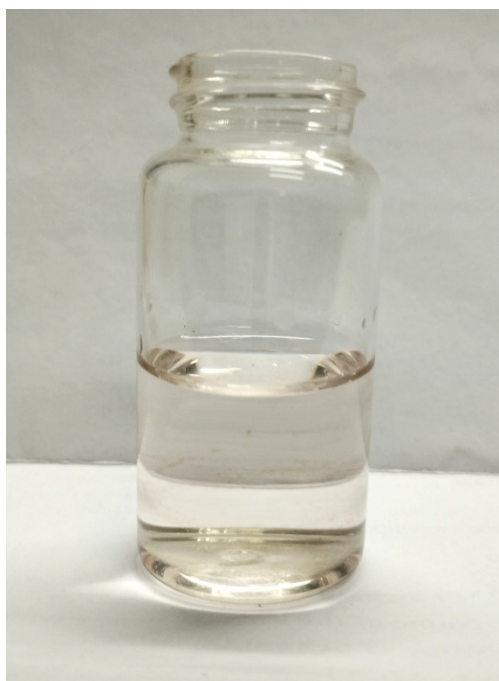

**Fig. S10.** MeOH used as an eluent for regenerative studies pale red color observed after being in contact with 0.2% SnO<sub>2</sub>@SA beads for 2 min with continuous stirring

## References

- 1 M. Mohammadi Galangash, M. Mohaghegh Montazeri, A. Ghavidast and M. Shirzad-Siboni, Synthesis of carboxyl-functionalized magnetic nanoparticles for adsorption of malachite green from water: Kinetics and thermodynamics studies, *J. Chinese Chem. Soc.*, 2018, **65**, 940–950.
- 2 E. Abdelkader, L. Nadjia and V. Rose-Noëlle, Adsorption of Congo red azo dye on nanosized SnO<sub>2</sub> derived from sol-gel method, *Int. J. Ind. Chem.*, 2016, **7**, 53–70.
- 3 S. Lagergren, Zur theorie der sogenannten adsorption gelöster stoffe, *K. Sven. vetenskapsakademiens. Handl.*, 1898, **24**, 1–39.
- 4 Y.-S. Ho and G. McKay, Pseudo-second order model for sorption processes, *Process Biochem.*, 1999, **34**, 451–465.
- 5 W. J. Weber Jr and J. C. Morris, Kinetics of adsorption on carbon from solution, *J. Sanit. Eng. Div.*, 1963, **89**, 31–59.
- 6 S. Alam, B. Ullah, M. S. Khan, N. ur Rahman, L. Khan, L. A. Shah, I. Zekker, J. Burlakovs, A. Kallistova and N. Pimenov, Adsorption kinetics and isotherm study of basic red 5 on synthesized silica monolith particles, *Water*, 2021, **13**, 2803.
- 7 I. Langmuir, The adsorption of gases on plane surfaces of glass, mica and platinum., *J. Am. Chem. Soc.*, 1918, **40**, 1361–1403.

- 8 H. Jiang, Y. Cao, F. Zeng, Z. Xie and F. He, A Novel Fe<sub>3</sub>O<sub>4</sub>/Graphene Oxide Composite Prepared by Click Chemistry for High-Efficiency Removal of Congo Red from Water, *J. Nanomater.*, 2021, **2021**, 9716897.
- 9 H. M. F. Freundlich, Over the adsorption in solution, *J. Phys. chem*, 1906, **57**, 1100–1107.
- 10 R. Sips, On the structure of a catalyst surface. II, *J. Chem. Phys.*, 1950, **18**, 1024–1026.
